# Supplementary material for: Genome-Wide Association Mapping of Mixed Linkage (1,3;1,4)-β-Glucan and Starch Contents in Rice Whole Grain
Source: Front Plant Sci. 2021 Aug 25;12:665745. doi: 10.3389/fpls.2021.665745 (PMC8424012; doi:10.3389/fpls.2021.665745)
Supplement: Supplementary file 1 [file Table_1.xlsx]

## Sheet: Supplementary Table S1
Supplementary Table S1. The information of rice association panel.
No,	Name	Sub-population	Country
3	ZHENSHAN 97 B	IND	China
5	AIJIAONANTE	TEJ	China
6	ARC 6578	AUS	India
7	ARC 7229	AUS	India
8	CAROLINA GOLD	TRJ	United States
9	CAROLINA GOLD SEL	TRJ	United States
11	GERDEH	ADMIX	Iran
12	GEUMOBYEO	TEJ	South Korea
13	HABIGANJ BORO 6	ADMIX	Bangladesh
14	HON CHIM	IND	Hong Kong
15	ITALICA CAROLINA	TEJ	Poland
16	KASALATH	AUS	India
19	MEHR	AUS	Iran
20	MOROBEREKAN	TRJ	Guinea
21	RTS 14	IND	Vietnam
22	BR24	IND	Bangladesh
23	KIUKI NO . 46	TEJ	Japan
25	AI -CHIAO-HONG	IND	China
26	AMPOSTA	TEJ	Puerto Rico
29	ASWINA 330	AUS	Bangladesh
30	AZERBAIDJANICA	TEJ	Azerbaijan
31	BABER	TEJ	India
35	BALDO	ADMIX	Italy
37	BASMATI 217	TRJ	India
39	BENLLOK	TEJ	Peru
40	BERENJ	ADMIX	Afghanistan
41	BICO BRANCO	AROMATIC	Brazil
42	BINULAWAN	IND	Philippines
43	BISER 1	TEJ	Bulgaria
44	BJ 1	AUS	India
45	BLACK GORA	AUS	India
47	BOA VISTA	TRJ	El Salvador
48	BOMBILLA	TEJ	Spain
49	BOMBON	TEJ	Spain
50	BRITISH HONDURAS CREOLE	TRJ	Belize
52	BULGARE	TEJ	France
53	CANELLA DE FERRO	TRJ	Brazil
54	CAUCASICA	TEJ	Former Soviet Union
55	CENIT	TRJ	Afghanistan
57	CHIBICA	TEJ	Mozambique
59	CHINA 1039	IND	China
61	CHUAN 4	AUS	Taiwan
63	COARSE	AUS	Pakistan
64	COCODRIE	TRJ	United States
65	COPPOCINA	TRJ	Bulgaria
66	CREOLE	TRJ	Belize
68	CUBA 65	TRJ	Cuba
69	CYBONNET	TRJ	United States
70	DAM	ADMIX	Thailand
72	DAWEBYAN	IND	Myanmar
73	DEE GEO WOO GEN	IND	Taiwan
74	DELLA	TRJ	United States
76	DEOKJEOKJODO	TEJ	Korea
77	DESVAUXII	TEJ	Former Soviet Union
78	DHALA SHAITTA	AUS	Dhala Shaitta
79	DJIMORON	IND	Guinea
80	DOBLE CAROLINA RINALDO BARSANI	ADMIX	Uruguay
81	DOM ZARD	AROMATIC	Iran
82	DOM-SOFID	AROMATIC	Iran
83	DOSEL	TEJ	Spain
86	EDITH	TRJ	China
87	EDOMEN SCENTED	TEJ	Japan
88	EMATA A 16-34	TEJ	Myanmar
89	ESTRELA	ADMIX	Colombia
90	FIROOZ	AROMATIC	Colombia
91	FORTUNA	TRJ	United States
92	FOSSA AV	TRJ	Burkina Faso
93	GAMBIAKA SEBELA	TEJ	Mali
94	GHATI KAMMA NANGARHAR	AUS	Afghanistan
95	GHORBHAI	AUS	Bangladesh
96	GOGO LEMPUK	TRJ	Indonesia
97	GORIA	AUS	Bangladesh
98	GOTAK GATIK	ADMIX	Indonesia
99	GUAN-YIN-TSAN	IND	China
100	GUINEANDAO	ADMIX	Guinea
101	HALWA GOSE RED	AUS	Iraq
102	HATSUNISHIKI	TEJ	Japan
103	HIDERISIRAZU	ADMIX	Japan
104	HONDURAS	TRJ	Honduras
105	HSIA-CHIOH-KEH-TU	IND	Taiwan
107	HUNAN EARLY DWARF NO. 3	IND	China
108	IGUAPE CATETO	TRJ	Haiti
109	IR 36	IND	Philippines
111	IR-44595	IND	Nepal
112	JAMIR	AUS	Bangladesh
116	JOUIKU 393G	TEJ	Japan
117	KACHILON	AUS	Bangladesh
118	KALAMKATI	AUS	India
119	Kalubala Vee	AUS	Sri Lanka
120	KAMENOO	TEJ	Japan
121	KANIRANGA	TRJ	Indonesia
122	KARABASCHAK	TEJ	Bulgaria
123	KARKATI 87	AUS	Bangladesh
125	KAUKKYI ANI	ADMIX	Myanmar
126	KHAO GAEW	AUS	Thailand
127	KHAO TOT LONG 227	AUS	Thailand
128	KIANG-CHOU-CHIU	IND	Taiwan
129	KIHOGO	TEJ	Tanzania
131	KITRANA 508	AROMATIC	Madagascar
132	KON SUITO	TEJ	Mongolia
133	KOSHIHIKARI	TEJ	Japan
134	KUN-MIN-TSIEH-HUNAN	IND	China
135	L 202	TRJ	United States_CA
136	LACROSSE	ADMIX	United States
137	LADY WRIGHT SELN	TRJ	United States
138	LAMBAYEQUE 1	AROMATIC	Peru
139	LEAH	TRJ	LEAH
140	LEMONT	TRJ	United States
142	LIGERITO	TRJ	Colombia
143	LIANERO 501	TRJ	Venezuela
144	LOMELLO	TEJ	Thailand
145	LUK TAKHAR	TEJ	Afghanistan
147	M-202	ADMIX	United States-CA
148	MANSAKU	TEJ	Mongolia
149	MARATELLI	TEJ	Italy
150	MELANOTRIX	TEJ	Tajikistan
153	NIQUEN	TRJ	Niquen
155	NORIN 20	TEJ	Japan
156	NOVA	ADMIX	United States
157	O-LUEN-CHEUNG	IND	Taiwan
158	OKSHITMAYIN	ADMIX	Myanmar
159	ORO	TEJ	Chile
161	OS6	TRJ	Nigeria
162	OSOGOVKA	ADMIX	Macedonia
163	OSTIGLIA	TEJ	Argentina
164	PADI KASALLE	TRJ	Indonesia
165	PADI PAGALONG	TRJ	chine
168	PALMYRA	ADMIX	United States
169	PAO TOU HUNG	IND	China
171	PARAIBA CHINES NOVA	IND	Brazil
172	PATE BLANC MN 1	TRJ	Cote D'Ivoire
173	PATNA	TEJ	Morocco
174	PATO DE GALLINAZO Y 5371	ADMIX	Australia
175	PAUNG MALAUNG	AUS	Myanmar
176	PEH-KUH	IND	Taiwan
177	PEH-KUH-TSAO-TU	IND	Taiwan
178	PHUDUGEY	AUS	Bhutan
179	PIRINAE 69	ADMIX	Former Yugoslavia
180	PRATAO	TRJ	Brazil
184	RAZZA 77	TEJ	Italy
186	RIKUTO NORIN 21	ADMIX	Japan
187	RINALDO BERSANI	ADMIX	Italy
189	ROJOFOTSY 738	ADMIX	Madagascar
192	SAB INI	TEJ	Egypt
193	SABHARAJ	IND	Bangladesh
194	SADRI BELYI	AROMATIC	Azerbaijan
195	SADRI TOR MISRI	ADMIX	Iran
198	SANTHI SUFAID	AUS	Pakistan
200	SATHI	AUS	Pakistan
201	SATURN	ADMIX	United States
203	SHAI-KUH	IND	China
204	SHANGYU 394	TEJ	China
207	SHIRKATI	AUS	Afghanistan
212	SINAMPAGA SELECTION	TRJ	Philippines
213	SINTANE DIOFOR	IND	Burkina Faso
214	SITPWA	TEJ	Myanmar
215	SRI MALAYSIA DUA	TEJ	Malaysia
216	SUFAID	AUS	Pakistan
217	SULTANI	TRJ	Egypt
218	SUNDENSIS	IND	Kazakhstan
220	SZE GUEN ZIM	IND	China
222	TA MAO TSAO	TEJ	China
223	TADUKAN	IND	Philippines
227	TAIPEI 309	TEJ	Taiwan
229	TEQING	IND	China
230	TIA BURA	TRJ	Indonesia
232	TOKYO SHINO MOCHI	ADMIX	Japan
233	TONDOK	TRJ	Indonesia
236	TRIOMPHE DU MARCO	TEJ	Morocco
237	TROPICAL RICE	TEJ	Ecuador
238	TSIPALA 421	ADMIX	Madagascar
239	UZBEKSKIJ 2	TEJ	Uzbekistan
240	VARY VATO 462	ADMIX	Madagascar
241	VAVILOVI	TEJ	Kazakhstan
242	VIALONE	TEJ	Italy
243	VICTORIA F.A.	ADMIX	Argentina
244	WIR 3764	TEJ	Uzbekistan
247	ZHENSHAN 2	AUS	China
248	KHAO PAHK MAW	AUS	Thailand
250	BLUE ROSE SUPREME	ADMIX	usa
251	MANZANO	TRJ	Zaire
254	SINAGUING	TRJ	Philippines
258	JASMINE 85	IND	Philippines
259	WANICA	TRJ	Suriname
262	KAW LUYOENG	TEJ	Thailand
265	AGOSTANO	TEJ	Italy
266	ARIAS	TRJ	Indonesia
267	EARLY	IND	United States
268	GUATEMALA 1021	TRJ	Guatemala
271	KATY	TRJ	United States
273	LAGRUE	TRJ	United States
274	PECOS	ADMIX	United States
275	ROSEMONT	TRJ	United States
276	SABER	TRJ	United States
277	STEGARU 65	TEJ	Romania
279	BENGAL	ADMIX	United States
283	NPE 835	TEJ	Pakistan
