# Supplementary material for: Genome-Wide Association Mapping of Mixed Linkage (1,3;1,4)-β-Glucan and Starch Contents in Rice Whole Grain
Source: Front Plant Sci. 2021 Aug 25;12:665745. doi: 10.3389/fpls.2021.665745 (PMC8424012; doi:10.3389/fpls.2021.665745)
Supplement: Supplementary file 2 [file Table_2.xlsx]

## Sheet: Supplementary Table S2
Supplementary Table S2. Decay distances of LD on different rice chromosomes for r^2= 0.1 and r^2=0.2
		Decay distances(bp)
	mean R^2	r^2=0.1	r^2=0.2
chr1	0.3183	1148000	397000
chr2	0.4681	1935000	669000
chr3	0.2933	2425000	838000
chr4	0.2315	858000	297000
chr5	0.5307	2950000	1018000
chr6	0.3127	1420000	490000
chr7	0.3503	2630000	908000
chr8	0.2863	1338000	462000
chr9	0.307	2059000	712000
chr10	0.2407	1274000	440000
chr11	0.2672	452000	157000
chr12	0.2449	1259000	435000
Mean	0.3209	1645666	568583
