# Supplementary material for: Genome-Wide Association Mapping of Mixed Linkage (1,3;1,4)-β-Glucan and Starch Contents in Rice Whole Grain
Source: Front Plant Sci. 2021 Aug 25;12:665745. doi: 10.3389/fpls.2021.665745 (PMC8424012; doi:10.3389/fpls.2021.665745)
Supplement: Supplementary file 3 [file Table_3.xlsx]

## Sheet: supplementary Table 3
Supplementary Table S3. Genomic regions associated to the studied traits and the respective candidate genes.
QTL	Chromosome	No. of associated SNPs	Position/interval (Mbp)±50kb	-Log10(p)	MSU IDs of genes located in the associated region
qMLg1.1	1	12	30.598	5.8	LOC_Os01g53190, LOC_Os01g53200, LOC_Os01g53210, LOC_Os01g53240, LOC_Os01g53250, LOC_Os01g53260, LOC_Os01g53220, LOC_Os01g53230, LOC_Os01g53280, LOC_Os01g53294, LOC_Os01g53330
qMLg7.1	7	14	0.333	5.4	LOC_Os07g01600, LOC_Os07g01560, LOC_Os07g01540, LOC_Os07g01550, LOC_Os07g01470, LOC_Os07g01490, LOC_Os07g01480, LOC_Os07g01480, LOC_Os07g01450, LOC_Os07g01460, LOC_Os07g01440
qMLg12.1	12	7	20.773	4.2	LOC_Os12g34340, LOC_Os12g34350, LOC_Os12g34330, LOC_Os12g34320, LOC_Os12g34300, LOC_Os12g34220
qMLg4	4	5	5.934	4	LOC_Os04g10940, LOC_Os04g10924, LOC_Os04g10910, LOC_Os04g10870, LOC_Os04g10890
qMLg3.1	3	15	8.868	3.9	LOC_Os03g16150, LOC_Os03g16140, LOC_Os03g16130, LOC_Os03g16120, LOC_Os03g16090, LOC_Os03g16080, LOC_Os03g16070, LOC_Os03g16060, LOC_Os03g16050, LOC_Os03g16040, LOC_Os03g16030, LOC_Os03g16020, LOC_Os03g16010, LOC_Os03g16000
aMLg3.2	3	11	32.773	3.8	LOC_Os03g57560, LOC_Os03g57545, LOC_Os03g57540, LOC_Os03g57530, LOC_Os03g57520, LOC_Os03g57510, LOC_Os03g57500, LOC_Os03g57490, LOC_Os03g57430, LOC_Os03g57420, LOC_Os03g57410, LOC_Os03g57400, LOC_Os03g57450, LOC_Os03g57425
qMLg1.2	1	16	32.111	3.7	LOC_Os01g55830, LOC_Os01g55820, LOC_Os01g55799, LOC_Os01g55780, LOC_Os01g55770, LOC_Os01g55790, LOC_Os01g55750, LOC_Os01g55740, LOC_Os01g55730, LOC_Os01g55720, LOC_Os01g55710, LOC_Os01g55700, LOC_Os01g55690, LOC_Os01g55670, LOC_Os01g55650
qMLg7.2	7	15	0.337	3.6	LOC_Os07g01620, LOC_Os07g01600, LOC_Os07g01580, LOC_Os07g01570, LOC_Os07g01560, LOC_Os07g01550, LOC_Os07g01540, LOC_Os07g01530, LOC_Os07g01520, LOC_Os07g01490, LOC_Os07g01480, LOC_Os07g01460, LOC_Os07g01450, LOC_Os07g01440
qMLg11	11	3	17.846	3.5	LOC_Os11g30620, LOC_Os11g30690, LOC_Os11g30620
qSTh12	12	16	27.299	4	LOC_Os12g44100, LOC_Os12g44090, LOC_Os12g44080, LOC_Os12g44070, LOC_Os12g44060, LOC_Os12g44050, LOC_Os12g44030, LOC_Os12g44020, LOC_Os12g44010, LOC_Os12g44000, LOC_Os12g43990, LOC_Os12g43970, LOC_Os12g43950, LOC_Os12g43940, LOC_Os12g43930, LOC_Os12g43890
qSTh1.1	1	7	26.874	3.9	LOC_Os01g47100, LOC_Os01g47130, LOC_Os01g47110, LOC_Os01g47080, LOC_Os01g47070, LOC_Os01g47050, LOC_Os01g47040, LOC_Os01g46990
qSTh7.1	7	15	0.663	3.7	LOC_Os07g02210, LOC_Os07g02200, LOC_Os07g02192, LOC_Os07g02140, LOC_Os07g02180, LOC_Os07g02090, LOC_Os07g02060, LOC_Os07g02030
qSTh10	10	15	14.517	3.6	LOC_Os10g28060, LOC_Os10g28050, LOC_Os10g28040, LOC_Os10g28030, LOC_Os10g28009, LOC_Os10g28000, LOC_Os10g27990, LOC_Os10g27980, LOC_Os10g27480, LOC_Os10g27460, LOC_Os10g27470, LOC_Os10g27450, LOC_Os10g27440, LOC_Os10g27430
qSTh2	2	13	4.032	3.6	LOC_Os02g07790, LOC_Os02g07780, LOC_Os02g07770, LOC_Os02g07750, LOC_Os02g07740, LOC_Os02g07760, LOC_Os02g07730, LOC_Os02g07720, LOC_Os02g07690, LOC_Os02g07680, LOC_Os02g07670, LOC_Os02g07709, LOC_Os02g07700
