# Supplementary material for: Genome-Wide Association Mapping of Mixed Linkage (1,3;1,4)-β-Glucan and Starch Contents in Rice Whole Grain
Source: Front Plant Sci. 2021 Aug 25;12:665745. doi: 10.3389/fpls.2021.665745 (PMC8424012; doi:10.3389/fpls.2021.665745)
Supplement: Supplementary file 5 [file Table_5.xlsx]

## Sheet: supplementary Table 5
Supplementary Table S5. Co-expression analysis of candidate genes using riceFREND database.
Trait	Candidate gene	Description1	1st hirarchy co-expressed genes	Description2
MLG	LOC_Os01g53330	anthocyanidin 5,3-O-glucosyltransferase
			LOC_Os07g42250	Strictosidine synthase family protein.
			LOC_Os03g11250	Non-protein coding transcript, uncharacterized transcript.
MLG	LOC_Os07g01560	hexose transporter
			LOC_Os04g52190	Similar to Vacuolar sorting receptor 7 precursor (AtVSR7) (Epidermal growth factor receptor-like protein 3) (AtELP3) (BP80-like protein f) (AtBP80f).
			LOC_Os04g37980	Similar to Monosaccharide transporter 1.
			LOC_Os01g72170	Similar to Glutathione S-transferase GST 29 (EC 2.5.1.18).
			LOC_Os03g11900	Similar to Hexose transporter.
MLG	LOC_Os12g34360	expressed protein
			LOC_Os06g35630	FAD linked oxidase, N-terminal domain containing protein.
			LOC_Os08g28970	Protein of unknown function DUF599 family protein.
			LOC_Os04g37500	Glutamate decarboxylase (EC 4.1.1.15).
			LOC_Os08g44270	Similar to Cysteine proteinase (EC 3.4.22.-).
			LOC_Os11g04010	Similar to Metacaspase 7 (Metacaspase 4).
			LOC_Os04g54390	Similar to Senescence-associated protein 6.
MLG	LOC_Os03g16050	fructose-1,6-bisphosphatase
			LOC_Os12g19394	Similar to Petunia ribulose 1,5-bisphosphate carboxylase small subunit mRNA (clone pSSU 51), partial cds. (Fragment).
			LOC_Os12g19470	Similar to Petunia ribulose 1,5-bisphosphate carboxylase small subunit mRNA (clone pSSU 51), partial cds. (Fragment).
			LOC_Os08g29170	Similar to Quinone oxidoreductase-like protein.
MLG	LOC_Os03g57460	fasciclin protein
			LOC_Os01g16030	Similar to ADP-ribosylation factor.
			LOC_Os07g27810	DUF1218
			LOC_Os01g21960	Similar to Ser Thr specific protein kinase-like protein.
			LOC_Os05g08370	Similar to RSW1-like cellulose synthase catalytic subunit (Fragment).
			LOC_Os04g54810	Similar to Alpha-L-arabinofuranosidase/beta-D-xylosidase isoenzyme ARA-I.
MLG	LOC_Os01g55820	X8 protein
			LOC_Os05g36090	Zinc finger, DHHC-type domain containing protein
			LOC_Os01g39830	Beta-galactosidase precursor
MLG	LOC_Os07g01540	Ser/Thr protein phosphatase
			LOC_Os11g43760	Lipase, class 3 family protein
			LOC_Os11g40080	LNS2, Lipin/Ned1/Smp2 domain containing protein.
			LOC_Os04g59060	DnaJ, N-terminal domain containing protein.
			LOC_Os04g02000	Fus-prov protein.
			LOC_Os04g41950	Calcium-binding EF-hand domain containing protein.
			LOC_Os01g53720	UPF0054 family protein
			LOC_Os01g56880	Purple acid phosphatase (EC 3.1.3.2).
Starch content	LOC_Os12g44070	nodulin-like domain
			LOC_Os07g04810	Protein kinase-like domain containing protein.
Starch content	LOC_Os01g47050	kelch repeat containing protein
			LOC_Os03g05030	Plant disease resistance response protein family protein.
			LOC_Os11g19210	Similar to Beta-D-xylosidase.
			LOC_Os09g12290	Similar to Bifunctional aspartokinase/homoserine dehydrogenase 2, chloroplast precursor (AK-HD 2) (AK-HSDH 2) [Includes: Aspartokinase (EC 2.7.2.4); Homoserine dehydrogenase (EC 1.1.1.3)].
			LOC_Os01g67580	ABC transporter, transmembrane region, type 1 domain containing protein.
